# Supplementary material for: Plasma Pharmacokinetics and Tissue Distribution of Doxorubicin in Rats following Treatment with Astragali Radix
Source: MDPI journal article supplement (doi:10.3390/ph15091104), 2022-09-04
Supplement: s1 [file s1]

## Supplementary Information

### **Plasma pharmacokinetics and tissue distribution of doxorubicin in rats following treatment with Astragali Radix**

Yin Huang<sup>a,b</sup>, Fang Yang<sup>b</sup>, Linling Guo<sup>b</sup>, Yan Xu<sup>b</sup>, Xiaxia Yu<sup>c</sup>, Zunjian Zhang<sup>b\*</sup>, Yuxin Zhang<sup>a\*</sup>

<sup>a</sup> China Pharmaceutical University Nanjing Drum Tower Hospital, Nanjing, 210009, China

<sup>b</sup> Key Laboratory of Drug Quality Control and Pharmacovigilance, China Pharmaceutical University, Ministry of Education, Nanjing, 210009, China

<sup>c</sup> Department of Pharmacy, Affiliated Zhongda Hospital, School of Medicine, Southeast University, Nanjing 210009, China

\*Corresponding author:

Zunjian Zhang, Ph.D.

Key Laboratory of Drug Quality Control and Pharmacovigilance

China Pharmaceutical University, Ministry of Education

Email: [zzj@cpu.edu.cn](mailto:zzj@cpu.edu.cn)

Yuxin Zhang, Ph.D.

China Pharmaceutical University Nanjing Drum Tower Hospital

Email: [juliandth@163.com](mailto:juliandth@163.com)

## Methods

### Quality control of Astragali Radix water extract

#### *Sample preparation*

The freeze-dried powder containing approximately 100 mg crude slices was added with 1,000  $\mu\text{L}$  of methanol/water (70:30, V/V), and vortexed for 1 min. The mixture was then extracted ultrasonically for 10 min, and centrifuged for 10 min at 14,000 rpm. The supernatant was diluted 10 times with methanol/water (70:30, V/V) and filtered through a 0.22  $\mu\text{m}$  filter. Finally, 80  $\mu\text{L}$  of supernatant was added with 20  $\mu\text{L}$  of digoxin (50  $\mu\text{g/mL}$ , internal standard), vortexed for 1 min, and centrifuged at 14000 rpm for 10 min. The supernatant was transferred for LC-MS/MS analysis.

#### *LC-MS/MS analysis*

The quantification of 9 representative components of Astragali Radix (AR) was achieved using a Shimadzu Nexera UFLC system coupled to a MS-8040 triple quadrupole mass spectrometer system (Japan). The separation was performed on a Zorbax SB-C18 (2.1 $\times$ 100 mm, 1.8  $\mu\text{m}$ ) column with a flow rate of 0.30 mL/min at 40°C. The mobile phase A was 0.1% formic acid in water, and mobile B was acetonitrile. The gradient condition for separation was optimized as follows: 0-2 min, 10-35% B; 2-7 min, 35% B; 7-15 min, 35-90% B; 15-16 min, 90% B; 16-17 min, 90-10% B; 17-20 min, 10% B. The electrospray ionization (ESI) source was operated in the positive mode with multiple reaction monitoring (MRM). The main instrument parameters were as follows: nebulizing gas, 3 L/min; drying gas, 15 L/min; spray voltage, -3.5 KV; heat block temperature, 400°C; desorption line temperature, 250°C. The optimized MRM parameters and the quantification results are given in the following table.

| No. | Analytes            | MW     | Precursor ion<br>(m/z) | Product ion<br>(m/z) | CE<br>(eV) | Content<br>( $\mu\text{g/g}$ crude slices) |
|-----|---------------------|--------|------------------------|----------------------|------------|--------------------------------------------|
| 1   | Astragaloside I     | 869.04 | 870.1                  | 143.2                | -19        | 88.27                                      |
| 2   | Astragaloside II    | 827.0  | 827.5                  | 143.2                | -17        | 136.83                                     |
| 3   | Astragaloside III   | 784.97 | 786.1                  | 143.2                | -15        | 13.13                                      |
| 4   | Astragaloside IV    | 784.97 | 786.1                  | 143.2                | -15        | 59.93                                      |
| 5   | Isoastragaloside II | 827.0  | 827.5                  | 143.2                | -17        | 66.67                                      |
| 6   | Calycosin           | 284.28 | 285.1                  | 270.0                | -24        | 102.53                                     |

|    |                             |        |       |        |     |        |
|----|-----------------------------|--------|-------|--------|-----|--------|
| 7  | Calycosin-7-O-<br>glucoside | 446.44 | 446.8 | 285.0  | -18 | 437.33 |
| 8  | Formononetin                | 268.28 | 269.1 | 197.05 | -41 | 50.47  |
| 9  | Ononin                      | 430.44 | 431.1 | 269.0  | -17 | 169.23 |
| IS | Digoxin                     | 780.9  | 781.5 | 781.5  | -5  |        |

---

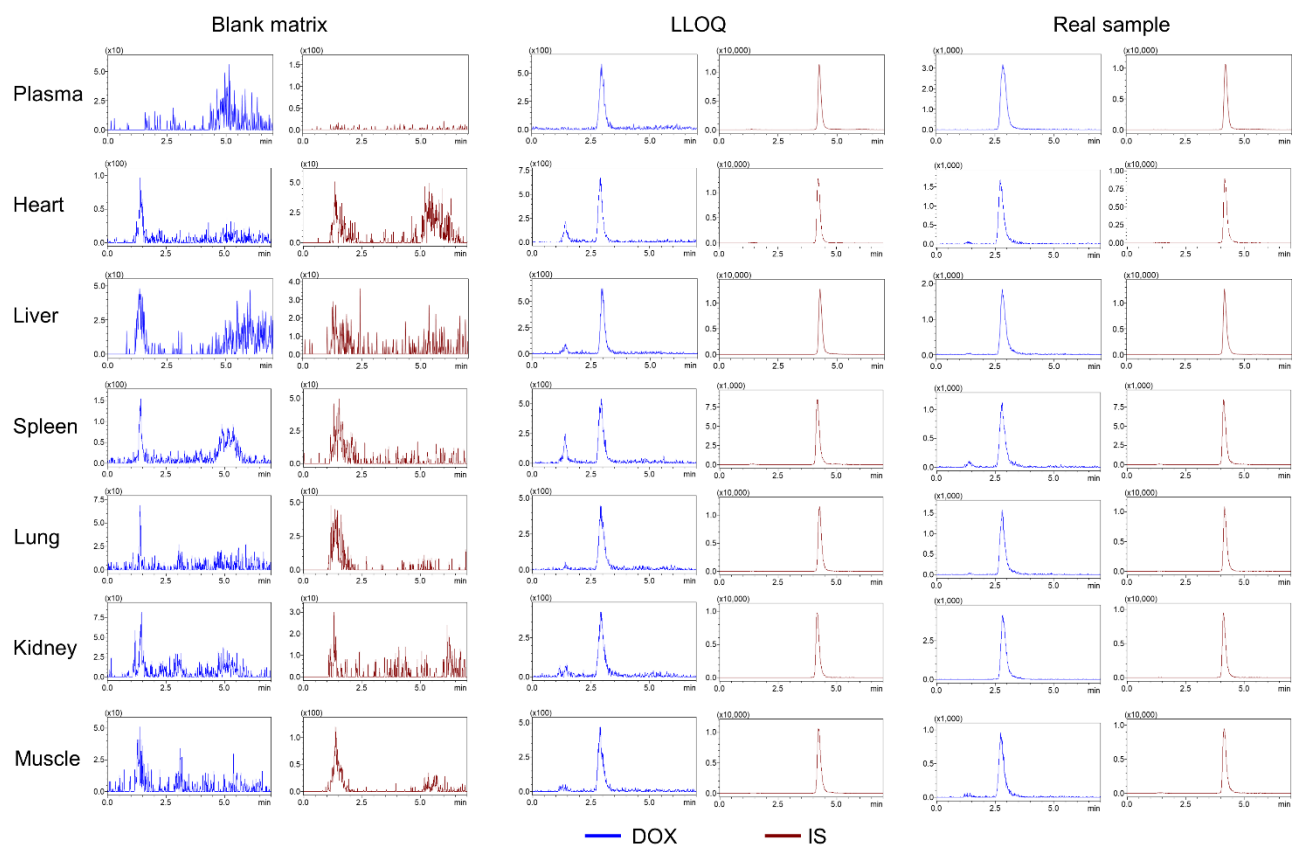

**Figure S1** The representative extracted ion chromatograms of DOX and IS in rat plasma and tissues. Retention times of DOX and IS were 2.85 min and 4.23 min, respectively.

**Table S1-1** The recovery and matrix effect for doxorubicin in rat plasma and six tissues.

| Biological matrix | Concentration | Recovery (n=5) |         | Matrix effect (n= 6) |         |
|-------------------|---------------|----------------|---------|----------------------|---------|
|                   |               | Mean (%)       | RSD (%) | Mean (%)             | RSD (%) |
| Plasma            | 10 ng/mL      | 95.49          | 6.56    | 97.40                | 7.35    |
|                   | 500 ng/mL     | 92.94          | 1.26    |                      |         |
|                   | 4000 ng/mL    | 87.34          | 2.74    | 89.71                | 2.28    |
| Liver             | 40 ng/g       | 92.93          | 2.10    | 99.66                | 5.03    |
|                   | 400 ng/g      | 88.40          | 4.11    |                      |         |
|                   | 2000 ng/g     | 92.69          | 4.47    | 89.8                 | 1.54    |
| Heart             | 40 ng/g       | 99.33          | 6.80    | 95.34                | 5.94    |
|                   | 400 ng/g      | 90.98          | 7.35    |                      |         |
|                   | 2000 ng/g     | 85.05          | 3.27    | 91.57                | 4.34    |
| Spleen            | 40 ng/g       | 72.23          | 5.16    | 93.38                | 5.36    |
|                   | 400 ng/g      | 67.98          | 2.21    |                      |         |
|                   | 2000 ng/g     | 66.34          | 6.74    | 94.57                | 2.53    |
| Kidney            | 100 ng/g      | 77.32          | 5.10    | 90.92                | 4.75    |
|                   | 1000 ng/g     | 80.62          | 3.58    |                      |         |
|                   | 5000 ng/g     | 78.64          | 5.76    | 87.37                | 1.98    |
| Lung              | 40 ng/g       | 87.76          | 3.82    | 90.12                | 5.37    |
|                   | 400 ng/g      | 82.98          | 2.55    |                      |         |
|                   | 2000 ng/g     | 87.62          | 3.32    | 88.19                | 0.94    |
| Skeletal muscle   | 40 ng/g       | 93.48          | 1.89    | 88.44                | 1.31    |
|                   | 400 ng/g      | 88.84          | 1.99    |                      |         |
|                   | 2000 ng/g     | 94.07          | 4.85    | 89.15                | 6.38    |

**Table S1-2** The recovery and matrix effect for IS in rat plasma and six tissues.

| Biological matrix | Concentration<br>(ng/mL) | Recovery (n=5) |     | Matrix effect (n= 6) |     |
|-------------------|--------------------------|----------------|-----|----------------------|-----|
|                   |                          | Mean           | RSD | Mean                 | RSD |

|                 |     | (%)   | (%)  | (%)    | (%)  |
|-----------------|-----|-------|------|--------|------|
| Plasma          | 500 | 95.89 | 2.48 | 100.67 | 8.71 |
| Liver           | 500 | 98.24 | 4.30 | 99.04  | 2.65 |
| Heart           | 500 | 96.27 | 2.75 | 99.29  | 6.16 |
| Spleen          | 500 | 90.77 | 3.87 | 98.88  | 6.62 |
| Kidney          | 500 | 86.58 | 2.93 | 89.07  | 2.87 |
| Lung            | 500 | 85.95 | 1.30 | 99.38  | 2.50 |
| Skeletal muscle | 500 | 92.25 | 2.98 | 96.95  | 4.28 |

**Table S2** The stability of doxorubicin under various storage conditions (n = 3).

| Biological matrix | Concentration | Short-term (room temperature, 10 h) |       | Auto-sampler (4 °C, 12 h) |      | Three freeze-thaw cycles (-80 °C) |       | Long-term (-80 °C for 30 d) |       |
|-------------------|---------------|-------------------------------------|-------|---------------------------|------|-----------------------------------|-------|-----------------------------|-------|
|                   |               | Mean                                | RSD   | Mean                      | RSD  | Mean                              | RSD   | Mean                        | RSD   |
|                   |               | (%)                                 | (%)   | (%)                       | (%)  | (%)                               | (%)   | (%)                         | (%)   |
| Plasma            | 10 ng/mL      | 92.06                               | 10.22 | 100.72                    | 4.42 | 88.62                             | 11.27 | 108.29                      | 0.30  |
|                   | 500 ng/mL     | 102.22                              | 0.65  | 92.17                     | 4.97 | 103.25                            | 7.25  | 93.66                       | 3.36  |
|                   | 4000 ng/mL    | 103.47                              | 5.52  | 90.45                     | 2.35 | 101.04                            | 7.03  | 94.93                       | 4.08  |
| Liver             | 40 ng/g       | 94.47                               | 1.51  | 97.64                     | 5.27 | 109.06                            | 1.21  | 106.67                      | 4.14  |
|                   | 2000 ng/g     | 87.30                               | 1.72  | 92.66                     | 2.19 | 102.36                            | 1.21  | 106.76                      | 1.46  |
| Heart             | 40 ng/g       | 91.00                               | 4.90  | 112.70                    | 2.10 | 96.65                             | 7.99  | 99.06                       | 4.81  |
|                   | 2000 ng/g     | 87.73                               | 1.33  | 98.93                     | 2.96 | 89.13                             | 1.39  | 95.28                       | 4.76  |
| Spleen            | 40 ng/g       | 94.10                               | 1.24  | 107.40                    | 5.25 | 101.67                            | 4.36  | 103.25                      | 3.95  |
|                   | 2000 ng/g     | 100.07                              | 1.91  | 111.77                    | 2.64 | 107.61                            | 3.09  | 108.42                      | 2.59  |
| Kidney            | 100 ng/g      | 101.12                              | 1.04  | 102.62                    | 3.97 | 102.67                            | 2.45  | 101.34                      | 1.62  |
|                   | 5000 ng/g     | 100.51                              | 2.16  | 101.27                    | 3.60 | 104.11                            | 3.00  | 103.90                      | 11.43 |
| Lung              | 40 ng/g       | 93.08                               | 6.77  | 102.87                    | 4.37 | 98.11                             | 5.16  | 98.53                       | 0.87  |
|                   | 2000 ng/g     | 95.45                               | 5.40  | 95.14                     | 4.58 | 107.42                            | 2.38  | 107.07                      | 1.98  |
| Skeletal muscle   | 40 ng/g       | 101.93                              | 1.35  | 105.95                    | 4.20 | 94.27                             | 1.23  | 104.41                      | 1.88  |
|                   | 2000 ng/g     | 95.26                               | 2.09  | 101.27                    | 5.08 | 102.73                            | 1.95  | 90.79                       | 5.41  |

**Table S3** The concentrations of DOX in six rat tissues at 48 h after intravenous administration of 5 mg/kg DOX (mean  $\pm$  SD).

| Tissue          | AR co-treatment     |                     | AR pre-treatment    |                      |
|-----------------|---------------------|---------------------|---------------------|----------------------|
|                 | DOX                 | DOX+AR (10g/kg x 1) | DOX                 | DOX+AR (10g/kg x 10) |
| Liver           | 40.07 $\pm$ 6.49    | 41.91 $\pm$ 5.47    | 49.53 $\pm$ 15.84   | 32.41 $\pm$ 9.26*    |
| Heart           | 82.21 $\pm$ 20.34   | 83.76 $\pm$ 17.26   | 142.54 $\pm$ 50.06  | 108.91 $\pm$ 30.40   |
| Spleen          | 125.17 $\pm$ 25.89  | 122.66 $\pm$ 20.19  | 185.60 $\pm$ 36.17  | 139.94 $\pm$ 50.68   |
| Kidney          | 296.65 $\pm$ 253.30 | 302.02 $\pm$ 310.97 | 162.41 $\pm$ 142.05 | 104.66 $\pm$ 33.78   |
| Lung            | 36.25 $\pm$ 15.96   | 32.64 $\pm$ 1.43    | 23.64 $\pm$ 5.23    | 21.89 $\pm$ 2.46     |
| Skeletal muscle | 40.84 $\pm$ 19.15   | 31.65 $\pm$ 5.25    | 31.93 $\pm$ 6.36    | 34.11 $\pm$ 9.87     |



**Table S4** Network-based separation between nine AR components and DOX disposition.

| Component               | PubChem ID | Target number | S <sub>AB</sub> |
|-------------------------|------------|---------------|-----------------|
| Astragaloside III       | 441905     | 6             | 0.168           |
| Isoastragaloside II     | 60148655   | 2             | 0.148           |
| Calycosin-7-O-glucoside | 5318267    | 12            | 0.085           |
| Ononin                  | 442813     | 14            | 0.074           |
| Astragaloside IV        | 13943297   | 39            | 0.059           |
| Formononetin            | 5280378    | 62            | -0.006          |
| Calycosin               | 5280448    | 41            | -0.130          |
| Astragaloside I         | 51346122   | 9             | -0.242          |
| Astragaloside II        | 11968895   | 14            | -0.282          |
